# Supplementary material for: Rab7 palmitoylation is required for efficient endosome-to-TGN trafficking
Source: Oxford University Press journal article supplement (doi:10.1242/jcs.199729), 2017-06-09
Supplement: jcs199729supp.pdf [file jcs199729supp.pdf]

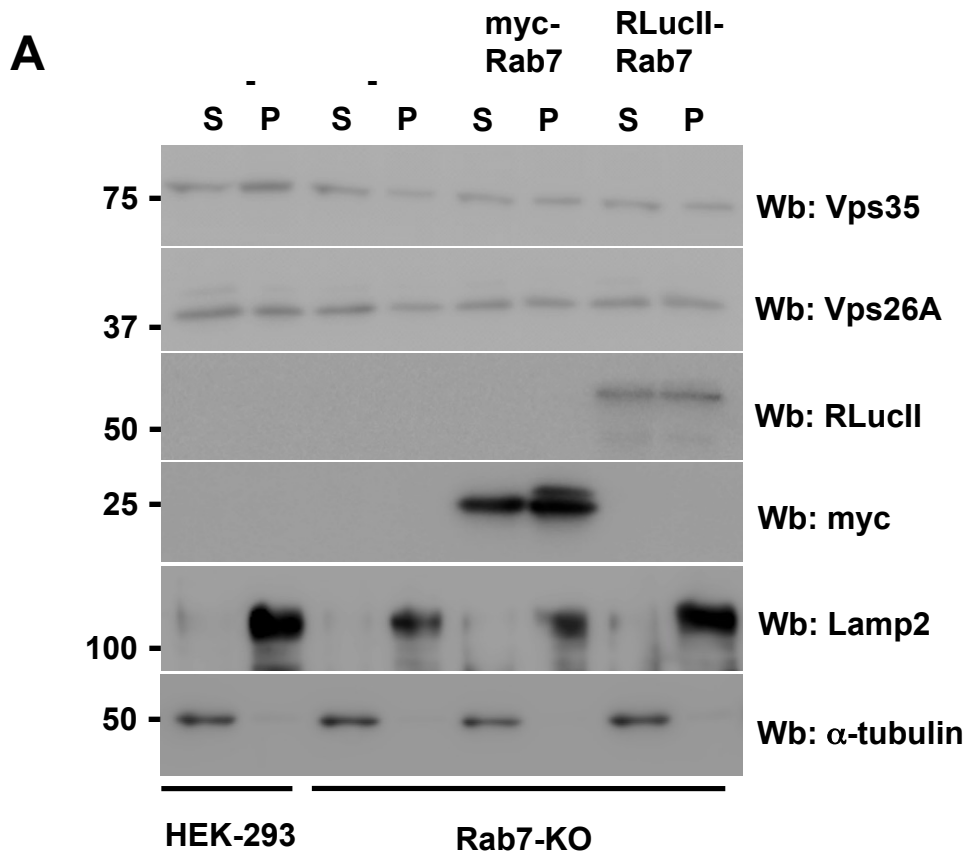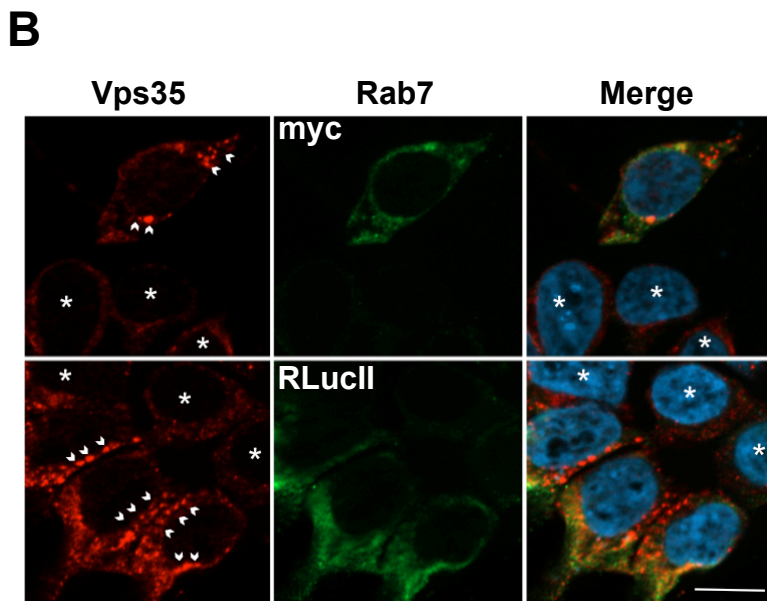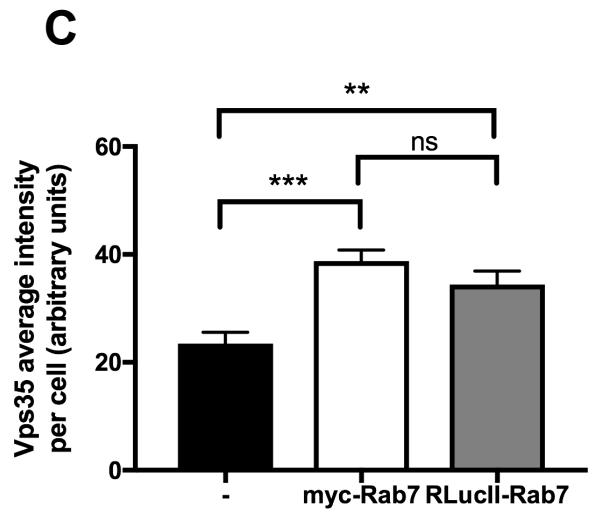

**Figure S1. RLucII-Rab7 is properly membrane recruited and functional**

(A) HEK-293 or Rab7-KO cells were transfected with myc-Rab7 or RLucII-Rab7. 48 hours post-transfection, a membrane separation assay was performed and samples were subjected to Western blot (Wb) with anti-Vps35, anti-Vps26A, anti-RLucII, anti-myc, anti-Lamp2 antibody (a membrane marker) and anti- $\alpha$ -tubulin (a cytosolic marker). (B) HEK-293 or Rab7-KO cells were transfected with myc-Rab7 or RLucII-Rab7. 48 hours post-transfection, the cells were fixed in 4% paraformaldehyde and immunofluorescence staining was performed with anti-myc (green) or anti-RLucII (green) and anti-Vps26A (red) antibodies. Scale bar = 10  $\mu$ m. (C) Fluorescence intensity of Vps35 staining was measured in Rab7-KO cells (black bar), Rab7-KO cells expressing myc-Rab7 (white bar) or RLucII-Rab7 (grey bar). Data is represented as mean Vps35 intensity  $\pm$  SEM from 31, 14, and 16 cells per condition. \*\*\*  $P < 0.001$ , \*\*  $P < 0.01$ , ns, not significant, One-way ANOVA with Tukey's post-hoc test.

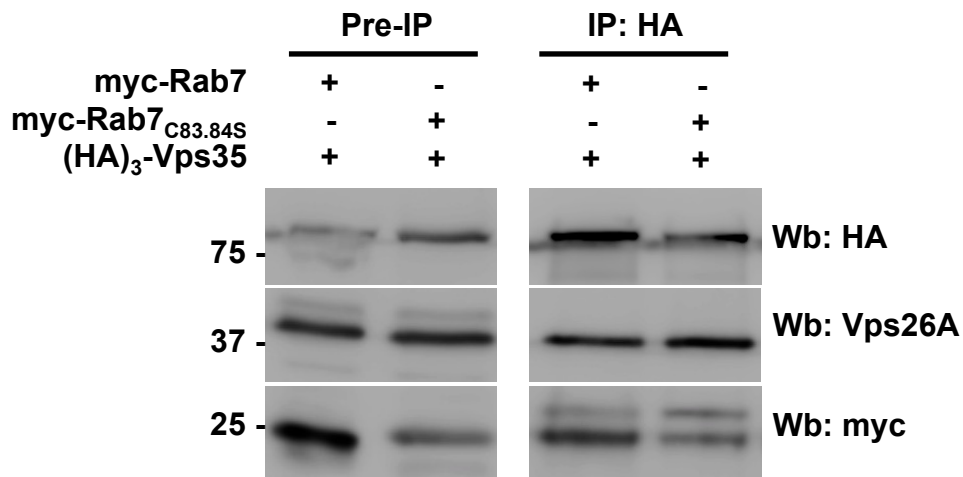

**Figure S2. Palmitoylation does not affect the Rab7/retromer interaction *per se*.**

HEK-293 were transfected with myc-Rab7, myc-Rab7<sub>C83,84S</sub> or (HA)<sub>3</sub>-Vps35. 24 hours after transfections, equal amounts of cell lysates from myc-Rab7 or myc-Rab7<sub>C83,84S</sub> transfected cells were mixed with lysate from HEK-293 expressing (HA)<sub>3</sub>-Vps35, followed by immunoprecipitation with anti-HA antibody. Eluted samples were loaded onto a 12% polyacrylamide gel and subjected to Western blot (Wb) analysis with anti-myc, anti-Vps26A and anti-HA antibodies.
